# Supplementary material for: Thermal sensitivity and flow-mediated migratory delays drive climate risk for coastal sockeye salmon
Source: Atypon-hosted journal article supplement (doi:10.1139/facets-2020-0027), 2021-01-01
Supplement: facets-2020-0027_supplement1.docx [file facets-2020-0027_supplement1.docx]

**Supplementary Material 1**

Probability statement:

Hyper-priors for transition probabilities:

Priors:
